# Supplementary material for: Antimicrobial peptide immobilization on catechol-functionalized PCL/alginate wet-spun fibers to combat surgical site infection
Source: Royal Society of Chemistry journal article supplement (doi:10.1039/d4tb00889h), 2024-01-01
Supplement: d4tb00889h1.pdf [file d4tb00889h1.pdf]

## *Supplementary Material*

# Antimicrobial Peptide Immobilization on Catechol- Functionalized PCL/Alginate Wetspun Fibers to Combat Surgical Site Infection

*Taufiq Hasan Aneem<sup>a</sup>, Mridul Sarker<sup>b</sup>, Siew Yee Wong<sup>c</sup>, Sierin Lim<sup>b</sup>, Xu Li<sup>c,d</sup>, Asif Rashed<sup>e</sup>,*

*Saumitra Chakravarty<sup>f</sup>, M Tarik Arafat<sup>a,\*</sup>*

<sup>a</sup> Department of Biomedical Engineering, Bangladesh University of Engineering and Technology  
(BUET), Dhaka-1205, Bangladesh

<sup>b</sup> Division of Bioengineering, School of Chemical and Biomedical Engineering, Nanyang  
Technological University, Singapore 637457

<sup>c</sup> Institute of Sustainability for Chemicals, Energy and Environment, A\*STAR (Agency for  
Science, Technology and Research), Singapore, 138634, Singapore

<sup>d</sup> Institute of Materials Research and Engineering (IMRE), A\*STAR (Agency for Science,  
Technology and Research), Singapore, 138634, Singapore

<sup>e</sup> Department of Microbiology, Mugda Medical College, Dhaka-1214, Bangladesh

<sup>f</sup> Department of Pathology, Bangabandhu Sheikh Mujib Medical University (BSMMU), Dhaka-  
1000, Bangladesh.

Keywords: Antibacterial resistance; Antimicrobial peptide; Surgical Site Infection; Resistant  
bacteria.

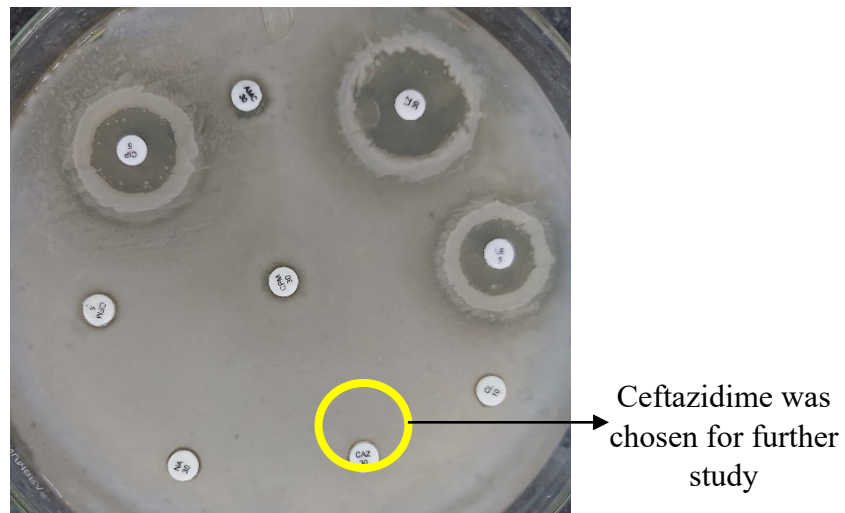

**Figure S1.** *Proteus* spp. demonstrated resistance to common antibiotics like ceftazidime, cefixime, cefepime, colistin etc. Among them ceftazidime was used to compare its activities against extracted AMP.

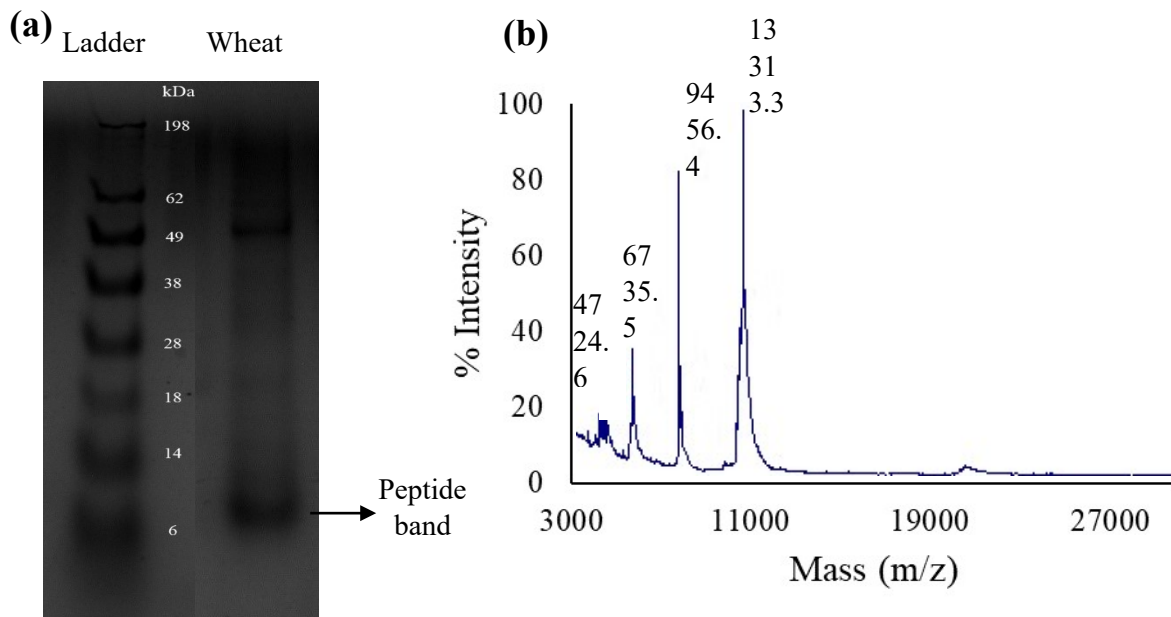

**Figure S2.** After anion exchange the purified peptides had masses between 6 and 14 kDa. Further purification by size exclusion chromatography and mass spectrometry revealed that the masses of

the purified proteins were around 6.7 and 9.4 kDa. The peak at 13.3 kDa ay indicate a dimeric form of the peptide with mass 6.7 kDa.

**Table S1.** Concentrations of peptides after size exclusion chromatography.

| Concentration before freeze drying (mg/mL) | Concentration after freeze drying (mg/mL) |
|--------------------------------------------|-------------------------------------------|
| 0.35                                       | 1.2                                       |

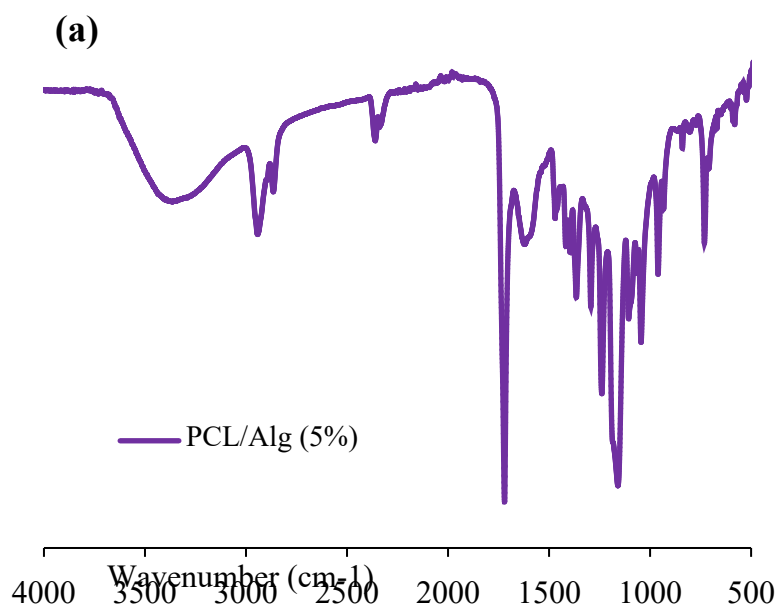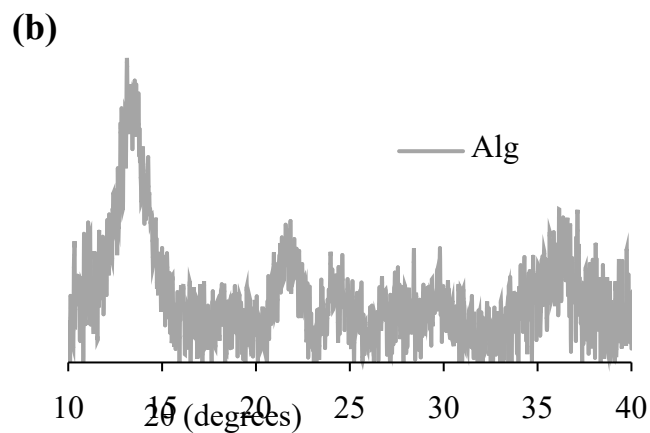

**Figure S3.** (a) ATR-FTIR spectra of PCL/Alg when 5% (w/v) Alg was used to manufacture the composite fiber, (b) XRD pattern of amorphous Alg.

**Table S2.** Glass transition temperatures, melting temperatures, initial degradation temperatures, and crystallinities of PCL, SA, and PCL-SA.

| <b>Sample name</b> | <b>Glass Transition Temperature (°C)</b> | <b>Melting Temperature (°C)</b> | <b>Initial Degradation Temperature (°C)</b> | <b>Crystallinity (%)</b> |
|--------------------|------------------------------------------|---------------------------------|---------------------------------------------|--------------------------|
| PCL                | ~-60                                     | ~59                             | ~359                                        | 72.3                     |
| SA                 | ~70                                      | —                               | ~36                                         | —                        |
| PCL-SA             | —                                        | ~62                             | ~319-329                                    | 78.4                     |
